# Supplementary material for: Effect of acid functionalised carbon supports for Pd–Ni–Sn catalyst on ethanol oxidation reaction
Source: Royal Society of Chemistry journal article supplement (doi:10.1039/c5ra07508d), 2015-01-01
Supplement: c5ra07508d1.pdf [file c5ra07508d1.pdf]

**Supporting Figures and Tables**

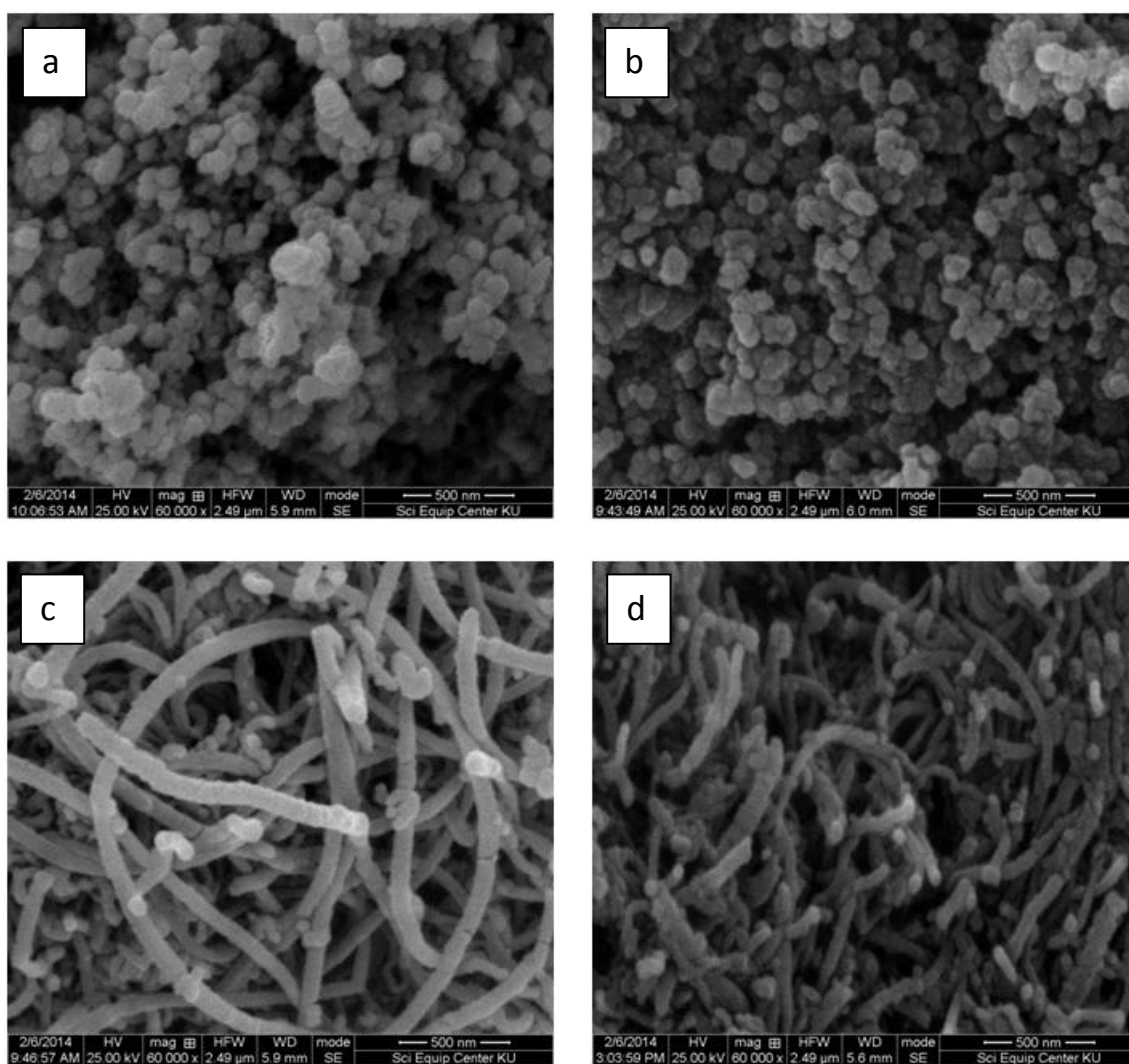

**Fig. S1** SEM image ( $\times 60,000$ ) of (a) CB (b) CB<sub>sn</sub> (c) MWCNTs (d) MWCNT<sub>sn</sub>.

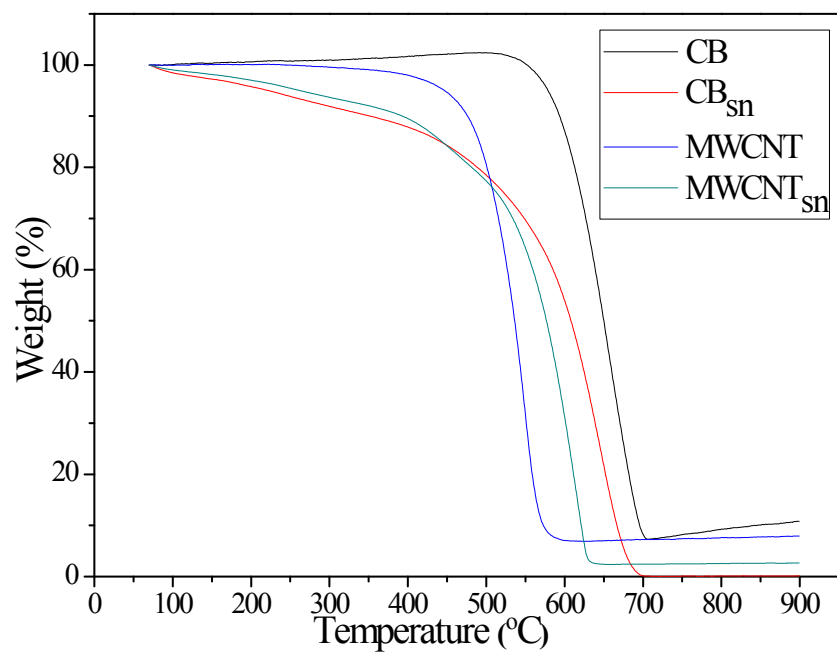

**Fig. S2** TGA thermograms obtained from thermal decomposition of different carbon supports.

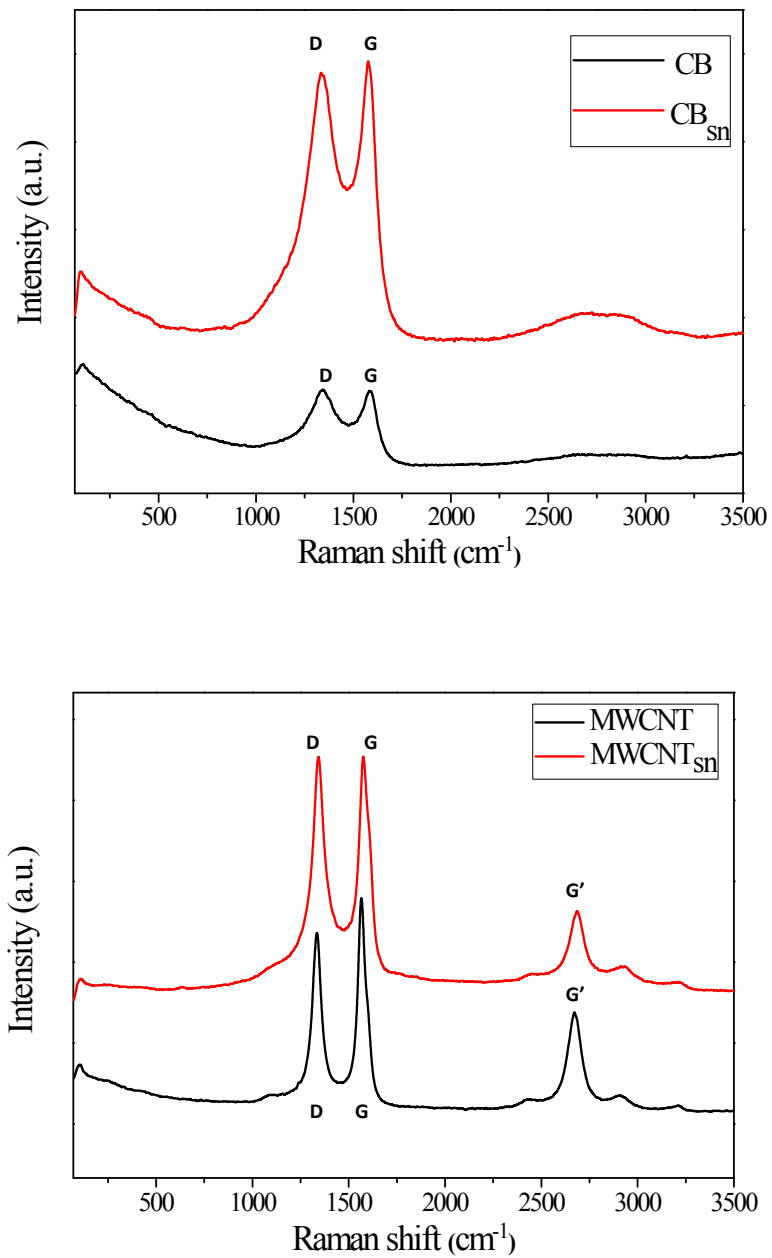

**Fig. S3** The Raman spectrum of CB compared to CB<sub>sn</sub> (top) and MWCNTs compared to MWCNT<sub>sn</sub> (bottom).

**Table SI** The  $I_D/I_G$  ratio of different carbon supports.

| Support             | $I_D/I_G$ ratio |
|---------------------|-----------------|
| CB                  | 0.837           |
| CB <sub>sn</sub>    | 0.828           |
| MWCNT               | 0.803           |
| MWCNT <sub>sn</sub> | 0.970           |

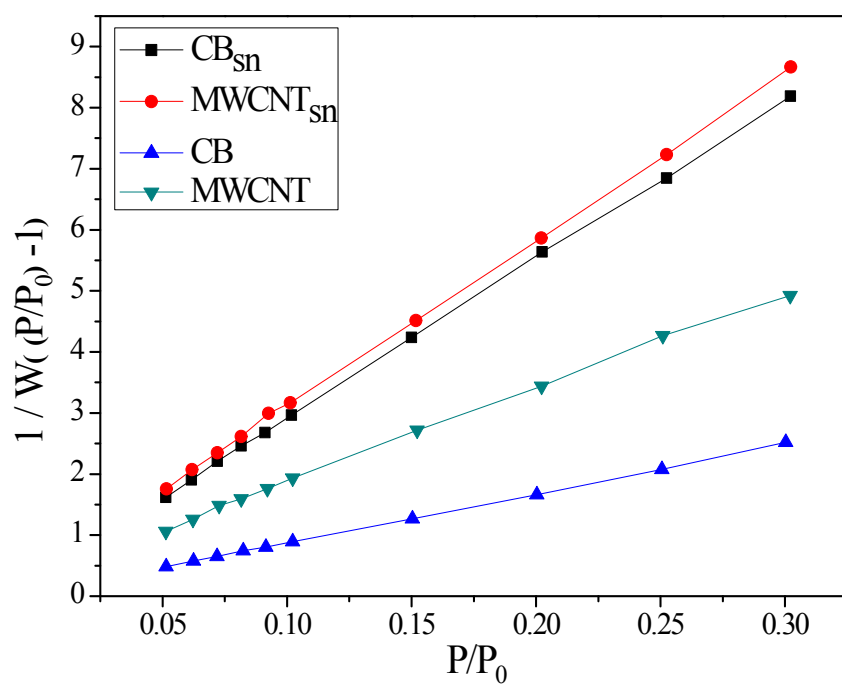

**Fig. S4** BET plots of different carbon supports.

**Table SII** BET surface area ( $S_{\text{BET}}$ ), average pore size and total pore volume of different carbon supports.

| Type of supports    | $S_{\text{BET}}$<br>( $\text{m}^2/\text{g}$ ) | Average pore size<br>(nm) | Total pore volume<br>( $\text{cm}^3/\text{g}$ ) |
|---------------------|-----------------------------------------------|---------------------------|-------------------------------------------------|
| CB                  | 427.40                                        | 12.28                     | 1.31                                            |
| MWCNT               | 221.00                                        | 27.33                     | 1.51                                            |
| CB <sub>sn</sub>    | 132.10                                        | 16.14                     | 0.53                                            |
| MWCNT <sub>sn</sub> | 126.00                                        | 11.92                     | 0.38                                            |
